# Supplementary material
Source: MDPI journal article supplement (https://www.mdpi.com/2078-2489/11/9/455)
Supplement: s1 [file s1]

Supplementary Tables:

Table S1: Creating classification classes for the histopathology reports

| Number | Regular expression code | Classification class |
|--------|-------------------------|----------------------|
| 1      | M-8\d\d\d/0             | Non-malignant        |
| 2      | M-8\d\d\d/1             | Non-malignant        |
| 3      | M-8\d\d\d/2             | Malignant            |
| 4      | M-8\d\d\d/3             | Malignant            |
| 5      | M-8\d\d\d/6             | Malignant            |
| 6      | M-8\d\d\d/9             | Non-malignant        |
| 7      | M-9\d\d\d/0             | Non-malignant        |
| 8      | M-9\d\d\d/1             | Non-malignant        |
| 9      | M-9\d\d\d/2             | Malignant            |
| 10     | M-9\d\d\d/3             | Malignant            |
| 11     | M-9\d\d\d/6             | Malignant            |
| 12     | M-9\d\d\d/9             | Non-malignant        |
| 13     | M-0000/0                | No diagnosis         |

Table S2: Important words according to TFIDF vectorizer

| token                                | weight   |
|--------------------------------------|----------|
| keeping cutaneous                    | 9,207129 |
| inflammation benign                  | 9,207129 |
| consistent metastatic                | 9,207129 |
| consistent metastatic adenocarcinoma | 9,207129 |
| consistent poorly                    | 9,207129 |
| consistent poorly differentiated     | 9,207129 |
| compatible invasive adenocarcinoma   | 9,207129 |
| compatible infiltrating              | 9,207129 |
| complex cyst                         | 9,207129 |
| invasive adenocarcinoma              | 9,207129 |
| invasive component                   | 9,207129 |
| features malignant                   | 9,207129 |
| inflamed hyperplastic                | 9,207129 |
| inflamed intestinal                  | 9,207129 |
| inflamed invasive                    | 9,207129 |
| inflamed macroscopic                 | 9,207129 |
| inflamed nodular                     | 9,207129 |
| inflamed polypoid                    | 9,207129 |
| inflamed seborrhoeic                 | 9,207129 |
| inflamed stromal                     | 9,207129 |
| inflamed tubular                     | 9,207129 |
| inflamed tumour                      | 9,207129 |
| inflamed ulcer                       | 9,207129 |
| inflamed urothelium                  | 9,207129 |

|                            |          |
|----------------------------|----------|
| inflammation acanthosis    | 9,207129 |
| inflammation acinar        | 9,207129 |
| inflammation activity      | 9,207129 |
| inflammation addition      | 9,207129 |
| unremarkable mild          | 9,207129 |
| inflammation aggregates    | 9,207129 |
| inflammation association   | 9,207129 |
| inflammation atrophic      | 9,207129 |
| inflammation atypical      | 9,207129 |
| inflamed free              | 9,207129 |
| inflamed focus             | 9,207129 |
| inflamed foci              | 9,207129 |
| infiltrative lesion        | 9,207129 |
| infiltration soft          | 9,207129 |
| infiltration subepithelial | 9,207129 |
| infiltration surrounding   | 9,207129 |
| unremarkable nasal         | 9,207129 |
| infiltrative areas         | 9,207129 |
| infiltrative borders       | 9,207129 |
| infiltrative carcinoma     | 9,207129 |
| infiltrative clusters      | 9,207129 |
| infiltrative edge          | 9,207129 |
| infiltrative margin        | 9,207129 |
| inflamed cyst              | 9,207129 |
| infiltrative margins       | 9,207129 |
| infiltrative minimum       | 9,207129 |
| infiltrative moderately    | 9,207129 |
| unremarkable myometrial    | 9,207129 |
| infiltrative solid         | 9,207129 |
| unremarkable mucosal       | 9,207129 |
| inflamed areas             | 9,207129 |
| inflamed colonic           | 9,207129 |
| inflamed contains          | 9,207129 |
| inflammation base          | 9,207129 |
| inflammation calcification | 9,207129 |
| unremarkable patent        | 9,207129 |
| inflammation carcinoma     | 9,207129 |
| inflammation large         | 9,207129 |
| inflammation left          | 9,207129 |
| inflammation likely        | 9,207129 |
| inflammation malignant     | 9,207129 |
| inflammation microabscess  | 9,207129 |
| inflammation mitotic       | 9,207129 |
| inflammation multinucleate | 9,207129 |
| inflammation observed      | 9,207129 |

|                           |          |
|---------------------------|----------|
| inflammation oncocytic    | 9,207129 |
| inflammation organising   | 9,207129 |
| inflammation perforation  | 9,207129 |
| inflammation possibly     | 9,207129 |
| inflammation presence     | 9,207129 |
| unremarkable maximum      | 9,207129 |
| inflammation radiation    | 9,207129 |
| inflammation reactive     | 9,207129 |
| inflammation regenerative | 9,207129 |
| inflammation see          | 9,207129 |
| unremarkable mammary      | 9,207129 |
| inflammation special      | 9,207129 |
| inflammation subtle       | 9,207129 |
| inflammation high         | 9,207129 |
| inflammation hepatic      | 9,207129 |
| inflammation hemorrhage   | 9,207129 |
| inflammation desmoplastic | 9,207129 |
| inflammation composed     | 9,207129 |
| inflammation conclusion   | 9,207129 |
| inflammation congested    | 9,207129 |
| inflammation consistent   | 9,207129 |
| inflammation cryptitis    | 9,207129 |
| inflammation cyst         | 9,207129 |
| inflammation cystic       | 9,207129 |
| inflammation dense        | 9,207129 |
| inflammation denuded      | 9,207129 |
| inflammation endocervical | 9,207129 |
| inflammation haemorrhage  | 9,207129 |
| inflammation epithelium   | 9,207129 |
| inflammation evident      | 9,207129 |
| inflammation extensive    | 9,207129 |
| inflammation fibrin       | 9,207129 |
| inflammation fibrois      | 9,207129 |
| inflammation findings     | 9,207129 |
| inflammation focus        | 9,207129 |
| inflammation follicular   | 9,207129 |
| inflammation fragment     | 9,207129 |
| infiltration smooth       | 9,207129 |
| infiltration posterior    | 9,207129 |
| infiltration not          | 9,207129 |
| infiltration neoplasm     | 9,207129 |
| infiltrate obscures       | 9,207129 |
| infiltrate one            | 9,207129 |
| infiltrate pathological   | 9,207129 |
| infiltrate prostatic      | 9,207129 |

|                          |          |
|--------------------------|----------|
| infiltrate sheets        | 9,207129 |
| infiltrate spiculated    | 9,207129 |
| infiltrate stroma        | 9,207129 |
| infiltrate superficial   | 9,207129 |
| infiltrate together      | 9,207129 |
| infiltrate trabeculae    | 9,207129 |
| unremarkable paratubal   | 9,207129 |
| infiltrated anastomosing | 9,207129 |
| infiltrated ductal       | 9,207129 |
| infiltrated large        | 9,207129 |
| infiltrated monotonous   | 9,207129 |
| infiltrated sheet        | 9,207129 |
| infiltrated short        | 9,207129 |
| infiltrated single       | 9,207129 |
| infiltrated spiculated   | 9,207129 |
| infiltrated variably     | 9,207129 |
| infiltrates fat          | 9,207129 |
| infiltrate not           | 9,207129 |
| infiltrate non           | 9,207129 |
| unremarkable parenchyma  | 9,207129 |
| infiltrate deeper        | 9,207129 |
| infiltrate acute         | 9,207129 |
| infiltrate adipose       | 9,207129 |
| infiltrate atypia        | 9,207129 |
| infiltrate bland         | 9,207129 |
| infiltrate cd20          | 9,207129 |
| infiltrate cd3           | 9,207129 |
| infiltrate comment       | 9,207129 |
| infiltrate consistent    | 9,207129 |
| infiltrate consists      | 9,207129 |
| infiltrate endometrial   | 9,207129 |
| infiltrate mature        | 9,207129 |
| infiltrate fused         | 9,207129 |
| infiltrate glandular     | 9,207129 |
| infiltrate haemosiderin  | 9,207129 |
| infiltrate inflammatory  | 9,207129 |
| infiltrate islands       | 9,207129 |
| infiltrate isolated      | 9,207129 |
| infiltrate keeping       | 9,207129 |
| infiltrate lamina        | 9,207129 |
| infiltrate mainly        | 9,207129 |
| infiltrates haemosiderin | 9,207129 |
| infiltrates large        | 9,207129 |
| infiltrates scattered    | 9,207129 |
| infiltration epidermis   | 9,207129 |

|                              |          |
|------------------------------|----------|
| unremarkable native          | 9,207129 |
| infiltration adipose         | 9,207129 |
| infiltration cannot          | 9,207129 |
| infiltration carcinoma       | 9,207129 |
| infiltration clusters        | 9,207129 |
| infiltration cords           | 9,207129 |
| infiltration diffuse         | 9,207129 |
| infiltration discohesive     | 9,207129 |
| infiltration ductal          | 9,207129 |
| infiltration glands          | 9,207129 |
| infiltrating tongues         | 9,207129 |
| infiltration groups          | 9,207129 |
| infiltration however         | 9,207129 |
| infiltration identified      | 9,207129 |
| infiltration infiltrates     | 9,207129 |
| infiltration infiltrating    | 9,207129 |
| infiltration intertrabecular | 9,207129 |
| infiltration left            | 9,207129 |
| infiltration muscularis      | 9,207129 |
| infiltration myometrium      | 9,207129 |
| infiltrating tubules         | 9,207129 |
| infiltrating thickened       | 9,207129 |
| infiltrates small            | 9,207129 |
| infiltrating dermal          | 9,207129 |
| infiltrates stromal          | 9,207129 |
| unremarkable ovarian         | 9,207129 |
| infiltrating adjacent        | 9,207129 |
| infiltrating annular         | 9,207129 |
| infiltrating bone            | 9,207129 |
| infiltrating cervical        | 9,207129 |
| infiltrating cohesive        | 9,207129 |
| infiltrating collagen        | 9,207129 |
| unremarkable oral            | 9,207129 |
| infiltrating glandular       | 9,207129 |
| unremarkable not             | 9,207129 |
| infiltrating groups          | 9,207129 |
| infiltrating high            | 9,207129 |
| infiltrating lesion          | 9,207129 |
| unremarkable oesophageal     | 9,207129 |
| infiltrating malignancy      | 9,207129 |
| unremarkable nutritional     | 9,207129 |
| unremarkable numerous        | 9,207129 |
| infiltrating normal          | 9,207129 |
| infiltrating pattern         | 9,207129 |
| inflammation suggesting      | 9,207129 |

|                             |          |
|-----------------------------|----------|
| inflammation superficial    | 9,207129 |
| inflammation telangiectasia | 9,207129 |
| instability detected        | 9,207129 |
| intact glandular            | 9,207129 |
| intact invasion             | 9,207129 |
| intact measures             | 9,207129 |
